# Supplementary material for: Isolation and Characterization of Trichoderma spp. for Antagonistic Activity against Avocado (Persea americana Mill) Fruit Pathogens
Source: MDPI journal article supplement (doi:10.3390/horticulturae8080714), 2022-08-09
Supplement: s1 [file s1]

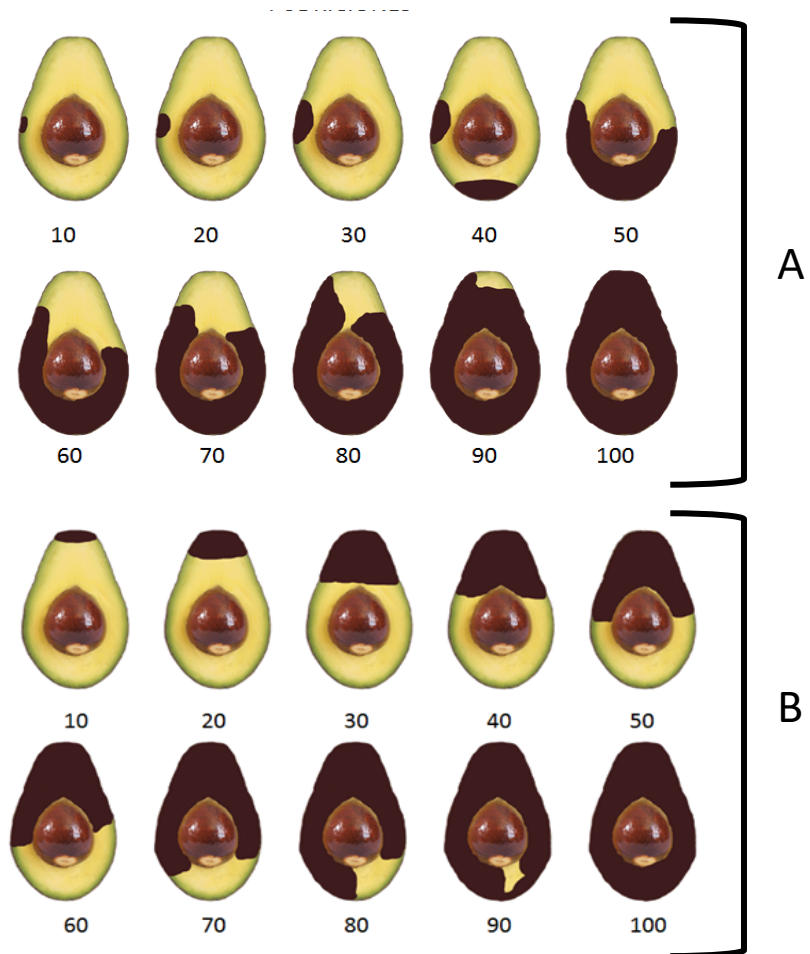

**Figure S1.** Percentage scale for fruit body rot (A) and stem rot (B) of avocado. The image was taken from López-López et al. [28].
